# Supplementary material for: Metformin Influence on the Intestinal Microbiota and Organism of Rats with Metabolic Syndrome
Source: MDPI journal article supplement (doi:10.3390/ijms23126837), 2022-06-20
Supplement: s1 [file s1]

## Supplementary Materials

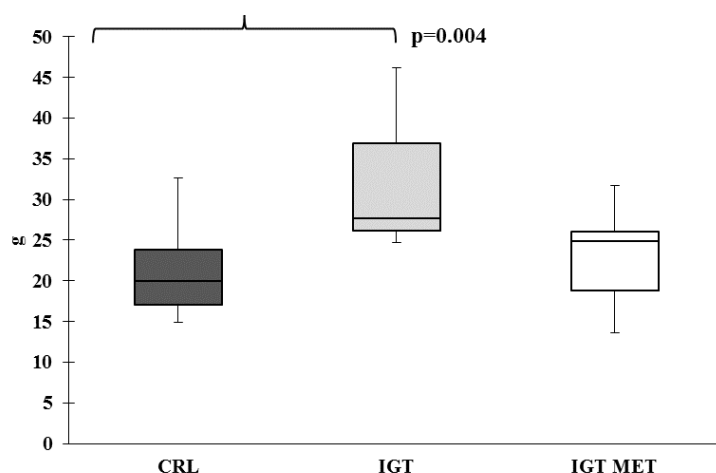

**Figure S1.** The omentum weight of rats from different groups at the end of experiment. Results are presented as median (25%; 75%). Notes: CRL – control group, IGT – impaired glucose tolerance group, IGT MET – impaired glucose tolerance + metformin group.

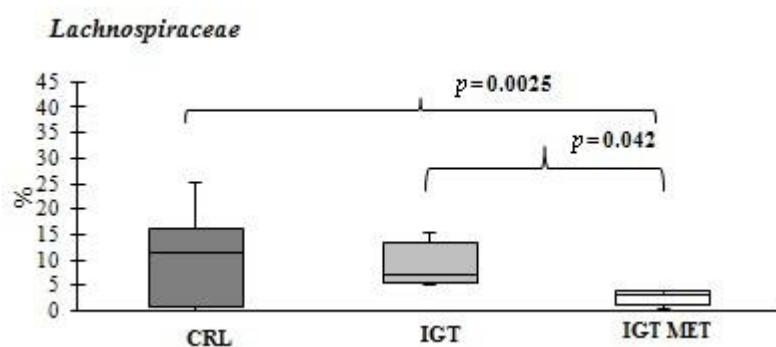

**Figure S2.** Relative abundances of family *Lachnospiraceae* of fecal samples of rats from different groups. Results are presented as median (25%; 75%). Notes: CRL – control group, IGT – impaired glucose tolerance group, IGT MET – impaired glucose tolerance + metformin group.

**Table S1.** The changes revealed after impaired glucose tolerance induction.

| Parameters                       | Increase                                                                                                         | Decrease                 |
|----------------------------------|------------------------------------------------------------------------------------------------------------------|--------------------------|
| Clinic and laboratory parameters | Weight of rats<br>Weight of omentum<br>Glucose level<br>Total cholesterol<br>Atherogenic coefficient<br>Ischemia | Functional of myocardium |

|                      |                           |                           |
|----------------------|---------------------------|---------------------------|
| qPCR (quantity)      | <i>Acinetobacter</i> spp. | <i>Lactobacillus</i> spp. |
| Metagenome 16S rRNA  | <i>Firmicutes</i> phylum  |                           |
| study                | <i>Akkermansia</i> spp.   |                           |
| (relative abundance) | <i>Bacteroides</i> spp.   |                           |
|                      | <i>Roseburiaspp.</i>      |                           |

**Table S2.** The changes revealed after metformin treatment of rats.

| Parameters                       | Increase                                                    | Decrease                                                                    |
|----------------------------------|-------------------------------------------------------------|-----------------------------------------------------------------------------|
| Clinic and laboratory parameters |                                                             | Body weight of rats<br>Glucose level<br>Cholesterol<br>Cardial infarct size |
| qPCR (quantity)                  | <i>Akkermansia muciniphila</i><br><i>Lactobacillus</i> spp. | <i>Acinetobacter</i> spp.<br><i>Roseburia unulinivorans</i>                 |
| Metagenome 16S rRNA              | <i>Actinobacteria</i> phylum                                | <i>Firmicutes</i> phylum                                                    |
| study                            | <i>Akkermansia</i> spp.                                     | <i>Lachnospiraceae</i> family                                               |
| (relative abundance)             |                                                             | <i>Roseburiaspp.</i><br><i>Bacteroides</i> spp.                             |

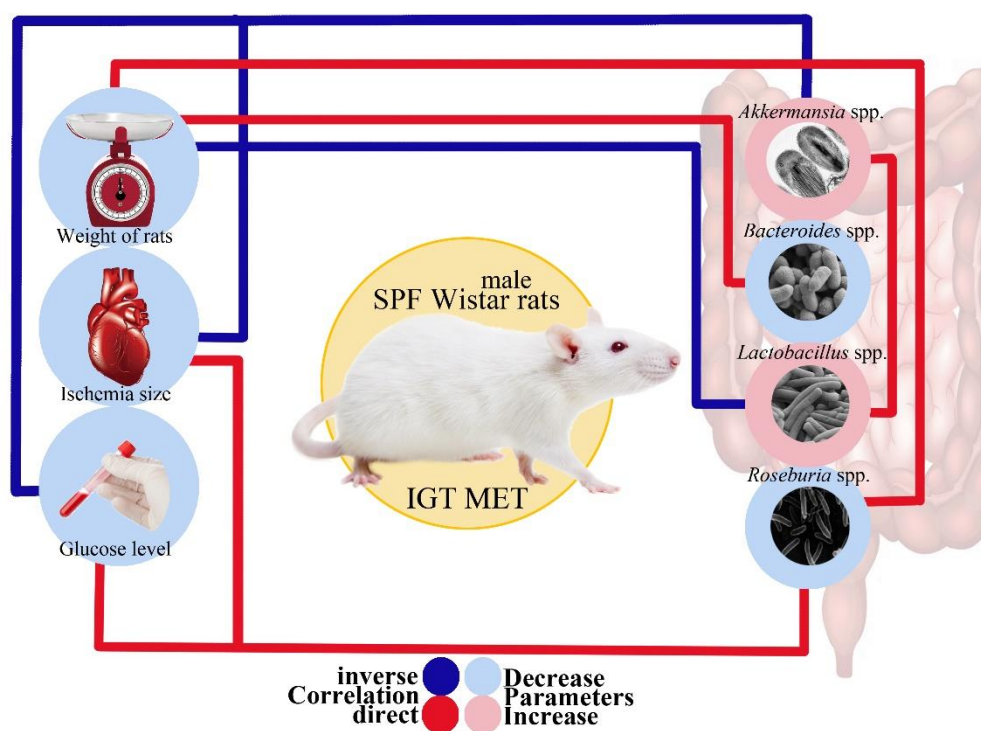

**Figure S3.** Correlations between the studied parameters after metformin therapy.

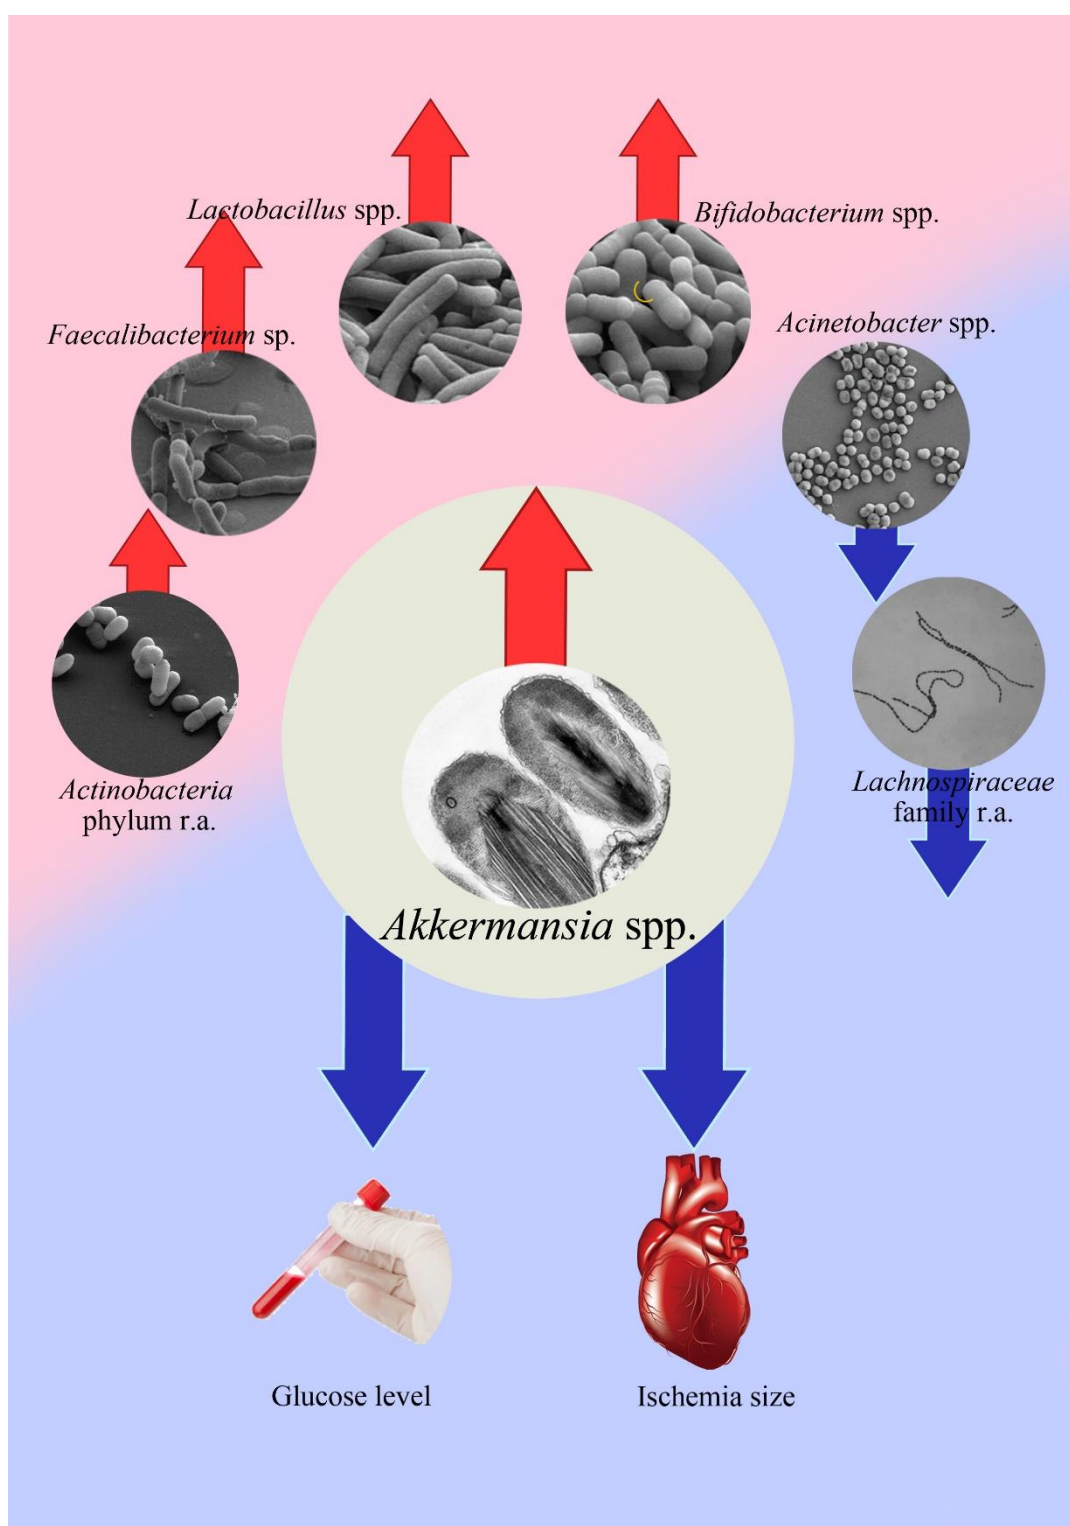

**Figures S4.** Changes of akkermansia representation and other parameters, connected with this bacteria.

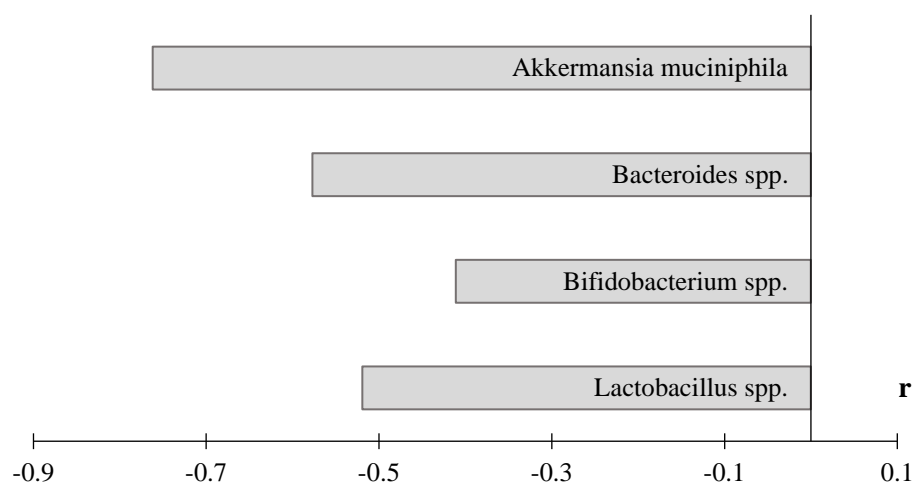

**Figure S5.** Coefficients of correlation by analysis between quantitative content of *Acinetobacter* spp. and other taxa in the intestinal microbiota at the end of the experiment. Notes: total data for all animals, the results of the study are presented using  $p < 0.05$ . Search for correlations between the studied parameters was performed using Spearman's test.

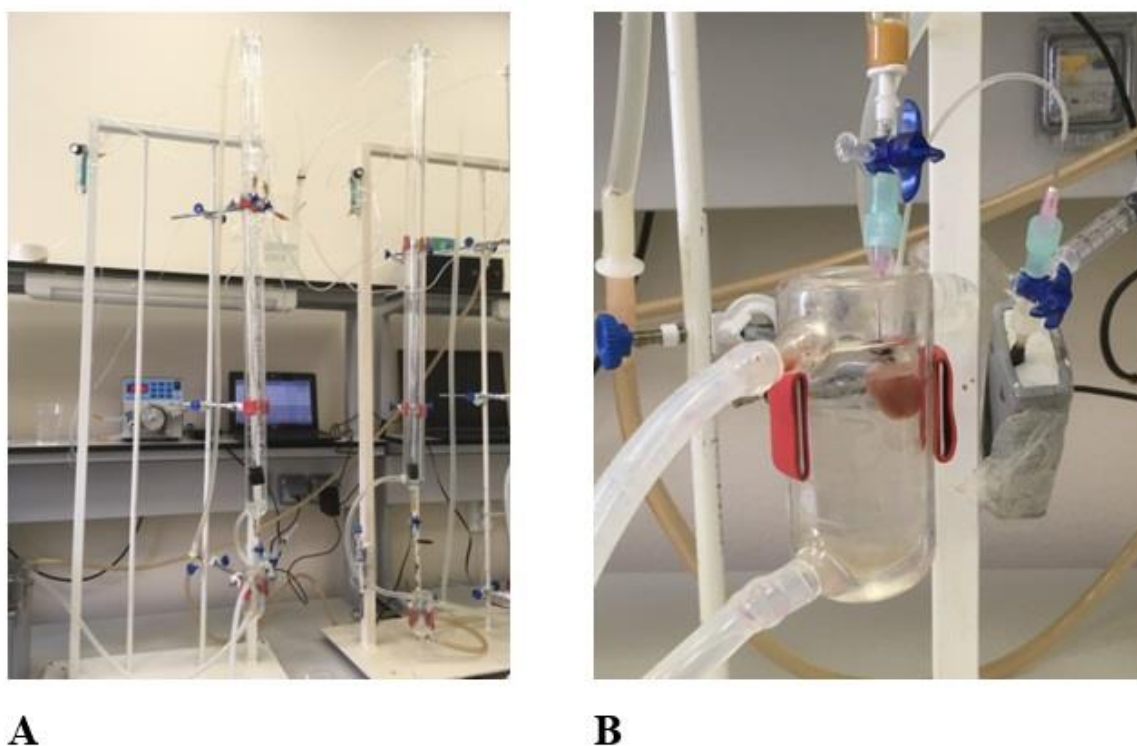

**Figure S6.** Isolated heart perfusion according to Langendorff. (A) modified Langendorff apparatus. (B) isolated perfusion of rat heart by Langendorff.
